# Supplementary material for: The nutrient-sensing Rag-GTPase complex in B cells controls humoral immunity via TFEB/TFE3-dependent mitochondrial fitness
Source: PubMed Central journal article supplement — Nat Commun. 2024 Nov 23;15:10163. doi: 10.1038/s41467-024-54344-5 (PMC11585635; doi:10.1038/s41467-024-54344-5), 2024-11-23
Supplement: 41467_2024_54344_MOESM2_ESM.pdf [file 41467_2024_54344_MOESM2_ESM.pdf]

## Reporting Summary

Nature Portfolio wishes to improve the reproducibility of the work that we publish. This form provides structure for consistency and transparency in reporting. For further information on Nature Portfolio policies, see our [Editorial Policies](#) and the [Editorial Policy Checklist](#).

### Statistics

For all statistical analyses, confirm that the following items are present in the figure legend, table legend, main text, or Methods section.

n/a | Confirmed

- The exact sample size ( $n$ ) for each experimental group/condition, given as a discrete number and unit of measurement
- A statement on whether measurements were taken from distinct samples or whether the same sample was measured repeatedly
- The statistical test(s) used AND whether they are one- or two-sided  
*Only common tests should be described solely by name; describe more complex techniques in the Methods section.*
- A description of all covariates tested
- A description of any assumptions or corrections, such as tests of normality and adjustment for multiple comparisons
- A full description of the statistical parameters including central tendency (e.g. means) or other basic estimates (e.g. regression coefficient) AND variation (e.g. standard deviation) or associated estimates of uncertainty (e.g. confidence intervals)
- For null hypothesis testing, the test statistic (e.g.  $F$ ,  $t$ ,  $r$ ) with confidence intervals, effect sizes, degrees of freedom and  $P$  value noted  
*Give  $P$  values as exact values whenever suitable.*
- For Bayesian analysis, information on the choice of priors and Markov chain Monte Carlo settings
- For hierarchical and complex designs, identification of the appropriate level for tests and full reporting of outcomes
- Estimates of effect sizes (e.g. Cohen's  $d$ , Pearson's  $r$ ), indicating how they were calculated

*Our web collection on [statistics for biologists](#) contains articles on many of the points above.*

### Software and code

Policy information about [availability of computer code](#)

Data collection

Seahorse Wave Analyzer Software v2.6 - Seahorse. XFe96 Analyzer  
 BD FACS Diva v8.01 - BD LSR II and Fortessa X20 (4-laser) flow cytometer  
 Attune NxT software - Invitrogen Attune NxT Flow Cytometer  
 MESO QuickPlex SQ 120 reader - p-S65-Ub ELISA  
 JEM1400 plus transmission electron microscope - TEM analysis  
 SpectraMax Plus Microplate Reader - ELISA  
 Olympus DP80 digital microscope - Immunofluorescence  
 Appliedbiosystems QuantStudio 3 - qRT-PCR  
 Azure biosystems 300Q - Immunoblot

## Data analysis

Zeiss ZEN (blue edition) v3.4 - Image analysis  
 Flow Jo v10 - Flow cytometry  
 Seahorse Wave Desktop Software v2.6 - Seahorse analysis  
 ImageJ v1.53t - Image analysis  
 Prism v10.0 for statistical analysis  
 Bulk RNA sequencing data was processed using R v4.2.1, GSEA 4.3.2.  
 Public single cell RNA sequencing data were annotated and aligned using Cell Ranger (v3.0.0), and analyzed using R 4.1.0, with the following packages: Seurat (v4).

For manuscripts utilizing custom algorithms or software that are central to the research but not yet described in published literature, software must be made available to editors and reviewers. We strongly encourage code deposition in a community repository (e.g. GitHub). See the Nature Portfolio [guidelines for submitting code & software](#) for further information.

## Data

Policy information about [availability of data](#)

All manuscripts must include a [data availability statement](#). This statement should provide the following information, where applicable:

- Accession codes, unique identifiers, or web links for publicly available datasets
- A description of any restrictions on data availability
- For clinical datasets or third party data, please ensure that the statement adheres to our [policy](#)

For the Single cell RNA sequencing data, we obtained the data from a public database ArrayExpress (E-MTAB-9478), and further analyzed the data.

## Research involving human participants, their data, or biological material

Policy information about studies with [human participants or human data](#). See also policy information about [sex, gender \(identity/presentation\), and sexual orientation](#) and [race, ethnicity and racism](#).

Reporting on sex and gender

N/A

Reporting on race, ethnicity, or other socially relevant groupings

N/A

Population characteristics

N/A

Recruitment

N/A

Ethics oversight

N/A

Note that full information on the approval of the study protocol must also be provided in the manuscript.

## Field-specific reporting

Please select the one below that is the best fit for your research. If you are not sure, read the appropriate sections before making your selection.

- Life sciences  Behavioural & social sciences  Ecological, evolutionary & environmental sciences

For a reference copy of the document with all sections, see [nature.com/documents/nr-reporting-summary-flat.pdf](https://www.nature.com/documents/nr-reporting-summary-flat.pdf)

## Life sciences study design

All studies must disclose on these points even when the disclosure is negative.

Sample size

Sample size was not pre-determined by any statistical methods. In each experiment, at least two biological replicates were analyzed, and similar to those reported in previous publications (PMID: 33406440, PMID: 27637146).

There were some exceptions. In Fig.3F, the sample size n = 2 for CreERRptorf/fl due to the limited mice available for this experiment.

Data exclusions

Mice with complete absence of germinal centers and lack of Alum spots after immunization were considered as failed intraperitoneal immunization, and the mice with assay values fell below the detection limit, were excluded from analysis.

Replication

All experiments included biological replicates. Each experiment reflects at least two independent replicates.

Randomization

For in vivo experiments we matched the sex and age of the mice in experimental batches. To minimize the cage effect and litter effect, we co-house control and experimental mice and use littermate control when it was possible.

Blinding

In all experiments, data collection and analysis were not conducted in a blinded manner, in accordance with standard practices in the field.

# Reporting for specific materials, systems and methods

We require information from authors about some types of materials, experimental systems and methods used in many studies. Here, indicate whether each material, system or method listed is relevant to your study. If you are not sure if a list item applies to your research, read the appropriate section before selecting a response.

## Materials & experimental systems

|                                     |                                     |                               |
|-------------------------------------|-------------------------------------|-------------------------------|
| n/a                                 | <input type="checkbox"/>            | Involved in the study         |
| <input type="checkbox"/>            | <input checked="" type="checkbox"/> | Antibodies                    |
| <input type="checkbox"/>            | <input checked="" type="checkbox"/> | Eukaryotic cell lines         |
| <input checked="" type="checkbox"/> | <input type="checkbox"/>            | Palaeontology and archaeology |
| <input type="checkbox"/>            | <input checked="" type="checkbox"/> | Animals and other organisms   |
| <input checked="" type="checkbox"/> | <input type="checkbox"/>            | Clinical data                 |
| <input checked="" type="checkbox"/> | <input type="checkbox"/>            | Dual use research of concern  |
| <input checked="" type="checkbox"/> | <input type="checkbox"/>            | Plants                        |

## Methods

|                                     |                                     |                        |
|-------------------------------------|-------------------------------------|------------------------|
| n/a                                 | <input type="checkbox"/>            | Involved in the study  |
| <input checked="" type="checkbox"/> | <input type="checkbox"/>            | ChIP-seq               |
| <input type="checkbox"/>            | <input checked="" type="checkbox"/> | Flow cytometry         |
| <input checked="" type="checkbox"/> | <input type="checkbox"/>            | MRI-based neuroimaging |

## Antibodies

### Antibodies used

| Antibody                                                   | Clone                | Manufacturer     | Cat no:      | Dilution |       |
|------------------------------------------------------------|----------------------|------------------|--------------|----------|-------|
| Alexa Fluor488 anti-mouse IgG1                             | RMG1-1               | Biolegend        | 406625       | 1:200    |       |
| PE/Cy7 anti-mouse CD19                                     | ID3                  | Biolegend        | 115520       | 1:300    |       |
| PerCP/Cy5.5 anti-mouse CD19                                | 6D5                  | Biolegend        | 115534       | 1:200    |       |
| BV605 Anti-mouse B220                                      | RA3-6B2              | Biolegend        | 103244       | 1:300    |       |
| FITC anti-mouse CD4                                        | GK1.5                | Biolegend        | 100510       | 1:300    |       |
| BV711 anti-mouse CD138                                     | 281-2                | Biolegend        | 142519       | 1:300    |       |
| APC/Cy7 anti-mouse IgD                                     | 11-26c.2a            | Biolegend        | 405715       | 1:400    |       |
| APC anti-mouse IgG1                                        | RMG1-1               | Biolegend        | 406609       | 1:200    |       |
| PE/Cy7 anti-mouse CD86                                     | GL-1                 | Biolegend        | 105014       | 1:300    |       |
| PE/Cy7 anti-mouse CD21/CD35                                | 7E9                  | Biolegend        | 123420       | 1:500    |       |
| PE anti-mouse CD98                                         | RL388                | Biolegend        | 128208       | 1:500    |       |
| APC anti-mouse CD45.1                                      | A20                  | Biolegend        | 110714       | 1:400    |       |
| Pacific Blue anti-mouse GL-7                               | GL7                  | Biolegend        | 144614       | 1:300    |       |
| BV605 Anti-mouse CD25                                      | PC61                 | Biolegend        | 102036       | 1:300    |       |
| FITC anti-mouse Ly-51                                      | 6C3                  | Biolegend        | 108305       | 1:200    |       |
| FITC anti-mouse CD23                                       | B3B4                 | Biolegend        | 101606       | 1:200    |       |
| PE anti-mouse CD45.2                                       | 104                  | Biolegend        | 109808       | 1:300    |       |
| PE/Cy7 anti-mouse CD24                                     | M1/69                | Biolegend        | 101822       | 1:1000   |       |
| Alexa Fluor488 anti-mouse CD278                            | C398.4A              | Biolegend        | 313514       | 1:200    |       |
| PE anti-mouse CD93                                         | AA4.1                | Biolegend        | 136503       | 1:300    |       |
| APC-eFluor 780 anti-mouse TCR beta                         | H57-597              | ThermoFisher     | 47-5961-82   | 1:300    |       |
| PE-Cy7 anti-mouse PD1                                      | J43                  | ThermoFisher     | 25-9985-82   | 1:400    |       |
| FITC Anti-mouse IgA                                        | mA-6E1               | ThermoFisher     | 11-4204-82   | 1:200    |       |
| APC anti-mouse CXCR4                                       | 2B11                 | ThermoFisher     | 17-9991-82   | 1:100    |       |
| eFluor 450 anti-mouse IgM                                  | II/41                | ThermoFisher     | 48-5790-82   | 1:200    |       |
| PE-Cyanine7 Ki-67                                          | SolA15               | Thermo Fisher    | 25-5698-82   | 1:500    |       |
| PE Anti-mouse CD43                                         | S7                   | BD Biosciences   | 553271       | 1:300    |       |
| Biotinylated anti-mouse CXCR5                              | 2G8                  | BD Biosciences   | 551960       | 1:100    |       |
| BV421 Anti-mouse/human Bcl6                                | K112-91              | BD Biosciences   | 563363       | 1:50     |       |
| AF647 anti-mouse CD95                                      | Jo2                  | BD Biosciences   | 563647       | 1:300    |       |
| APC anti-mouse IL-7RA                                      | A7R34                | Tonbo Bioscience | 20-1271-U100 | 1:200    |       |
| Brilliant Violet 421™ anti-mouse CD107a                    |                      | 1D4B             | Biolegend    | 121618   | 1:100 |
| Alexa Fluor® 700 anti-mouse/human CD45R/B220               | RA3-6B2              | Biolegend        | 103232       | 1:300    |       |
| Alexa Fluor® 488 anti-mouse/human GL7                      | GL7                  | Biolegend        | 144611       | 1:500    |       |
| Alexa Fluor® 647 anti-mouse CD98                           | RL388                | Biolegend        | 128210       | 1:500    |       |
| APC anti-mouse CD71                                        | R17217 (R17 217.1.4) | ThermoFisher,    | 17-0711-82   | 1:500    |       |
| FITC Anti-Mouse CD45.2                                     | 104                  | Cytex            | 35-0454-U100 | 1:300    |       |
| PE Phospho-S6 Ribosomal Protein (Ser235/236)               | D57.2.2E             | Cell Signaling   | 5316S        | 1:400    |       |
| Alexa Fluor® 647 Phospho-4E-BP1 (Thr37/46)                 | 236B4                | Cell Signaling   | 5123s        | 1:200    |       |
| PGC1 alpha Antibody                                        | N/A                  | Novusbio         | NBP1-04676   | 1:200    |       |
| Recombinant Anti-mtTFA antibody                            | EPR23548-120         | Abcam            | ab252432     | 1:500    |       |
| Alexa Fluor® 647 Anti-MTFCO1 antibody                      | 1D6E1A8              | Abcam            | ab198600     | 1:200    |       |
| Alexa Fluor® 488 Donkey anti-rabbit IgG (min.x-reactivity) | N/A                  | Biolegend        | 406416       | 1:500    |       |
| Alexa Fluor® 647 Donkey anti-rabbit IgG (min.x-reactivity) | N/A                  | Biolegend        | 406414       | 1:500    |       |
| Ghost Dye™ Violet 510                                      | N/A                  | Cytex            | 13-0870-T500 | 1:1000   |       |
| NP-PE                                                      | N/A                  | Biosearch        | N-5070-1     | 1:200    |       |

Antibody for immunofluorescence

| Antibody                                 | Clone     | Manufacturer        | Cat no: | Dilution |
|------------------------------------------|-----------|---------------------|---------|----------|
| Alexa Fluor® 647 anti-mouse IgD          | 11-26c.2a | Biologend           | 405708  | 1:100    |
| Alexa Fluor® 594 anti-mouse CD21/CD35    | 7E9       | Biologend           | 123426  | 1:200    |
| Streptavidin, Alexa Fluor™ 488 conjugate | N/A       | ThermoFisher        | S32354  | 1:1000   |
| Biotinylated Peanut Agglutinin (PNA)     | N/A       | Vector laboratories | B-1075  | 1:1000   |

Immunoblot antibody (1:1000 dilution except Alpha Tubulin and Lamin B1 were diluted at 1:5000)

| Antibody                                  | Clone     | Manufacturer        | Cat no:     |
|-------------------------------------------|-----------|---------------------|-------------|
| Phospho-4E-BP1 (Thr37/46) ( ) Rabbit mAb  | 236B4     | Cell signaling      | 2855s       |
| Phospho-S6 Ribosomal Protein (Ser235/236) | D57.2.2E) | Cell signaling      | 4858s       |
| Phospho-p70 S6 Kinase (Thr389) Antibody   | N/A       | Cell signaling      | 9205s       |
| LAMP1 (C54H11) Rabbit mAb                 | C54H11    | Cell signaling      | 3243S       |
| RagA (D8B5) Rabbit mAb                    | D8B5      | Cell signaling      | 4357S       |
| Raptor (24C12) Rabbit mAb                 | 24C12     | Cell signaling      | 2280S       |
| AID Monoclonal Antibody                   | mAID-2    | ThermoFisher        | 14-5959-80  |
| Anti-TFE3 antibody produced in rabbit     | N/A       | Sigma               | HPA023881   |
| TFEB Antibody                             | N/A       | Bethyl Laboratories | A303-673A-T |
| Alpha Tubulin Polyclonal antibody         | N/A       | Proteintech         | 11224-1-AP  |
| Lamin B1 Monoclonal antibody              | 3C10G12   | Proteintech         | 66095-1-Ig  |

## Validation

All antibodies employed in this study have been validated by commercial vendors. Specification sheet containing technical usage information and QC data for each antibody clone can be obtained from the manufacturer's website by searching for the associated catalog number. Further information can be obtained from the vendor's websites:  
<https://www.bdbiosciences.com/en-gb/products/reagents/flow-cytometry-reagents/research-reagents/quality-and-reproducibility>  
<https://www.biologend.com/en-us/quality/quality-control>  
<https://www.abcam.com/primary-antibodies/a-guide-to-antibody-validation>  
<https://www.ptglab.com/>  
[https://www.cellsignal.com/learn-and-support/videos-and-webinars/cst-antibody-validation-documentary?gclid=CjwKCAiAmJGhBAZEiwA1JZolqXP7c01OXJ8shE-IMEmfmQIzVesF22qol99dmdWL4DEEgZACFKj5hoCyLsQAvD\\_BwE&gclid=aw.ds](https://www.cellsignal.com/learn-and-support/videos-and-webinars/cst-antibody-validation-documentary?gclid=CjwKCAiAmJGhBAZEiwA1JZolqXP7c01OXJ8shE-IMEmfmQIzVesF22qol99dmdWL4DEEgZACFKj5hoCyLsQAvD_BwE&gclid=aw.ds)

The specificity of the antibody staining was experimentally assessed and validated using single-stain or unstained controls.

## Eukaryotic cell lines

Policy information about [cell lines and Sex and Gender in Research](#)

|                                                                   |                                                                                                                                      |
|-------------------------------------------------------------------|--------------------------------------------------------------------------------------------------------------------------------------|
| Cell line source(s)                                               | The retroviral packaging Plat-E cells were a gift from Dr. Hongbo Chi (St. Jude Children's Research Hospital) and from female origin |
| Authentication                                                    | Plat-E cell line was not authenticated.                                                                                              |
| Mycoplasma contamination                                          | The cell lines were not tested for mycoplasma in our lab.                                                                            |
| Commonly misidentified lines (See <a href="#">ICLAC</a> register) | No commonly misidentified cell lines used in this study                                                                              |

## Animals and other research organisms

Policy information about [studies involving animals; ARRIVE guidelines](#) recommended for reporting animal research, and [Sex and Gender in Research](#)

|                         |                                                                                                                                                                                                                                                                                                                                                                                                                                                                                                                                                                                                                                                                                            |
|-------------------------|--------------------------------------------------------------------------------------------------------------------------------------------------------------------------------------------------------------------------------------------------------------------------------------------------------------------------------------------------------------------------------------------------------------------------------------------------------------------------------------------------------------------------------------------------------------------------------------------------------------------------------------------------------------------------------------------|
| Laboratory animals      | Mice were maintained in Mayo Clinic animal facility under specific pathogen-free conditions with food and water in 12-hour dark-night cycles, in compliance with Mayo Clinic Institutional Animal Care and Use Committee guidelines and the protocol number is A00003354-18-R23. ROSA26-Cre-ERT2, Rragaf1/flRragbfl/fl, Rptorf1/fl, Tfebfl/fl, Tfe3-/-, CD45.1+ (RRID: IMSR_JAX:002014), C57BL/6J (RRID: IMSR_JAX:000664), and Rag1-/- (RRID: IMSR_JAX:002216), B6.129S2-Ighmtm1Cgn/J (RRID:IMSR_JAX:002288) and B6.129P2-Aicdatm1(cre)Mnz/J (RRID:IMSR_JAX:007770) were used in this study. And the mice were analyzed at the ages between 8 and 12 weeks as described in the manuscript. |
| Wild animals            | No wild animals were used in this study.                                                                                                                                                                                                                                                                                                                                                                                                                                                                                                                                                                                                                                                   |
| Reporting on sex        | Mice of both sexes were used.                                                                                                                                                                                                                                                                                                                                                                                                                                                                                                                                                                                                                                                              |
| Field-collected samples | No field collected samples were used this study.                                                                                                                                                                                                                                                                                                                                                                                                                                                                                                                                                                                                                                           |
| Ethics oversight        | All experiments were performed as outlined in protocol A00003354-18 approved by Mayo Clinic Institutional Animal Care and Use Committee.                                                                                                                                                                                                                                                                                                                                                                                                                                                                                                                                                   |

Note that full information on the approval of the study protocol must also be provided in the manuscript.

## Plants

|                       |                                                                                                                                                                                                                                                                                                                                                                                                                                                                                                                                                   |
|-----------------------|---------------------------------------------------------------------------------------------------------------------------------------------------------------------------------------------------------------------------------------------------------------------------------------------------------------------------------------------------------------------------------------------------------------------------------------------------------------------------------------------------------------------------------------------------|
| Seed stocks           | Report on the source of all seed stocks or other plant material used. If applicable, state the seed stock centre and catalogue number. If plant specimens were collected from the field, describe the collection location, date and sampling procedures.                                                                                                                                                                                                                                                                                          |
| Novel plant genotypes | Describe the methods by which all novel plant genotypes were produced. This includes those generated by transgenic approaches, gene editing, chemical/radiation-based mutagenesis and hybridization. For transgenic lines, describe the transformation method, the number of independent lines analyzed and the generation upon which experiments were performed. For gene-edited lines, describe the editor used, the endogenous sequence targeted for editing, the targeting guide RNA sequence (if applicable) and how the editor was applied. |
| Authentication        | Describe any authentication procedures for each seed stock used or novel genotype generated. Describe any experiments used to assess the effect of a mutation and, where applicable, how potential secondary effects (e.g. second site T-DNA insertions, mosaicism, off-target gene editing) were examined.                                                                                                                                                                                                                                       |

## Flow Cytometry

### Plots

Confirm that:

- The axis labels state the marker and fluorochrome used (e.g. CD4-FITC).
- The axis scales are clearly visible. Include numbers along axes only for bottom left plot of group (a 'group' is an analysis of identical markers).
- All plots are contour plots with outliers or pseudocolor plots.
- A numerical value for number of cells or percentage (with statistics) is provided.

### Methodology

|                           |                                                                                                                                                                                                                                                                                                                                                                                                                                                                                                                                                                                                                                                                                                                                                                                                                                                                                                                                                                                                                                                                                                                                                                                                                                                                                                                                                                                                                                                                                                                                                                                                                                                                                                                                                                                                                                                                                                                                                                                                                                                                                                                                                                                                 |
|---------------------------|-------------------------------------------------------------------------------------------------------------------------------------------------------------------------------------------------------------------------------------------------------------------------------------------------------------------------------------------------------------------------------------------------------------------------------------------------------------------------------------------------------------------------------------------------------------------------------------------------------------------------------------------------------------------------------------------------------------------------------------------------------------------------------------------------------------------------------------------------------------------------------------------------------------------------------------------------------------------------------------------------------------------------------------------------------------------------------------------------------------------------------------------------------------------------------------------------------------------------------------------------------------------------------------------------------------------------------------------------------------------------------------------------------------------------------------------------------------------------------------------------------------------------------------------------------------------------------------------------------------------------------------------------------------------------------------------------------------------------------------------------------------------------------------------------------------------------------------------------------------------------------------------------------------------------------------------------------------------------------------------------------------------------------------------------------------------------------------------------------------------------------------------------------------------------------------------------|
| Sample preparation        | Briefly, cells from spleens, mesenteric lymph nodes, and Peyer's patches were harvested by mashing with the syringe plunger on 70 µm cell strainers in cold preparing buffer (2% FBS in PBS). RBCs were depleted by incubating splenocytes with ACK Lysis Buffer (Gibco) for 1-2 mins at room temperature (20°C). Single cell suspensions were incubated with Fixable Viability Dye eFluor™ 510 (eBioscience) in PBS, followed by surface antibodies (30 mins on ice) in FACS buffer (PBS supplemented with 1% BSA). For intracellular staining, cells were fixed at RT with fresh True-Nuclear™ Transcription Factor Fix working solution. (Biolegend, Cat # 424401) for 30 min, and washed twice with True-Nuclear™ 1X Perm Buffer (Biolegend, Cat # 424401). Antibodies were prepared in the 1X Perm Buffer, and the cells were incubated with the antibodies at room temperature for at least 30 minutes in the dark. For LAMP1 staining, cells were fixed using Fixation/Permeabilization solution (BD, Cat # 554714) for 20 minutes at 4°C, followed by washing with 1x BD Perm/Wash™ buffer (BD, Cat # 554714) for twice. LAMP1 antibody was prepared using 1x BD Perm/Wash™ buffer, and cells were incubated with the antibody at 4°C for 30 minutes in the dark. For the phosflow staining, cells were fixed with 1X BD Phosflow™ Lyse/Fix Buffer (BD, Cat # 558049) in the water bath at 37°C for 10 minutes in the dark, followed by permeabilizing with cold BD Phosflow™ Perm Buffer III (BD, Cat # 558050) at 4°C for 30 minutes in the dark. Cells were incubated with the antibodies prepared in the FACS buffer after two washes with FACS buffer. For the indicators for mitochondrial membrane potential (TMRM, MTRM), mitochondrial ROS (MitoSox), and reactive oxygen species (CellROX) staining, cells were stained with viability dye and indicators (5 µM) at 37°C for 20 minutes in the dark, followed by surface staining at 4°C for 30 minutes in the dark. After antibody staining, cells were washed twice and resuspended in FACS buffer. Flow cytometry was performed on Invitrogen Attune NxT Flow Cytometer, BD Fortessa X-20 or LSR II instruments (both BD). |
| Instrument                | Samples were collected using Attune NxT Flow Cytometer or BD LSR II and Fortessa X20 (4-laser) flow cytometer                                                                                                                                                                                                                                                                                                                                                                                                                                                                                                                                                                                                                                                                                                                                                                                                                                                                                                                                                                                                                                                                                                                                                                                                                                                                                                                                                                                                                                                                                                                                                                                                                                                                                                                                                                                                                                                                                                                                                                                                                                                                                   |
| Software                  | Data was collected using BD FACS Diva v8.01, Attune NxT software and analyzed with FlowJo v10 (Tree Star)                                                                                                                                                                                                                                                                                                                                                                                                                                                                                                                                                                                                                                                                                                                                                                                                                                                                                                                                                                                                                                                                                                                                                                                                                                                                                                                                                                                                                                                                                                                                                                                                                                                                                                                                                                                                                                                                                                                                                                                                                                                                                       |
| Cell population abundance | <p>Cell Sorting</p> <p>Total B cells were isolated using the EasySep Mouse B Cell Isolation Kit (Stemcell Technologies, Cat # 19854) from the spleens (B cell frequency: 10%-30%), and Purity validated by flow cytometry was &gt;95%.</p> <p>For bulk RNA sequencing analysis of the GC B cells, B cells from the spleens of immunized mice were enriched with EasySep Mouse B Cell Isolation Kit (Stemcell Technologies, Cat # 19854), then the GC B cells (Fas+GL7+, Post-sort frequency: &gt;95%) cells were sorted from the enriched B cells (GC B cells, Pre-sort frequency: ~10%) using BD FACSMelody. For Vector, WT TFEB or Ca TFEB transduced B cells sorting, the pre-sort GFP frequency was 50%, 50%, 30% respectively, and the GFP+ cells were sorted out using BD FACSMelody, the post-sort GFP frequencies were all &gt;95%.</p>                                                                                                                                                                                                                                                                                                                                                                                                                                                                                                                                                                                                                                                                                                                                                                                                                                                                                                                                                                                                                                                                                                                                                                                                                                                                                                                                                 |
| Gating strategy           | Debris were excluded based on SSC-A vs. FSC-A gating. Doublets were then excluded by plotting FSC-H vs. FSC-A. Dead cells were excluded from analysis by gating on cells negative for the live/dead dye staining.                                                                                                                                                                                                                                                                                                                                                                                                                                                                                                                                                                                                                                                                                                                                                                                                                                                                                                                                                                                                                                                                                                                                                                                                                                                                                                                                                                                                                                                                                                                                                                                                                                                                                                                                                                                                                                                                                                                                                                               |

- Tick this box to confirm that a figure exemplifying the gating strategy is provided in the Supplementary Information.
